# Supplementary material
Source: PubMed Central journal article supplement (PMC4126626)
Supplement: rsbl20140347supp2.pdf [file rsbl20140347supp2.pdf]

**Electronic Supplementary Material 2:  
Complementary results.**

- 1) Relative importance of reflectance intensity in spectral bands for predicting the distribution of species recorded only in one of the two sites or recorded in both sites.**

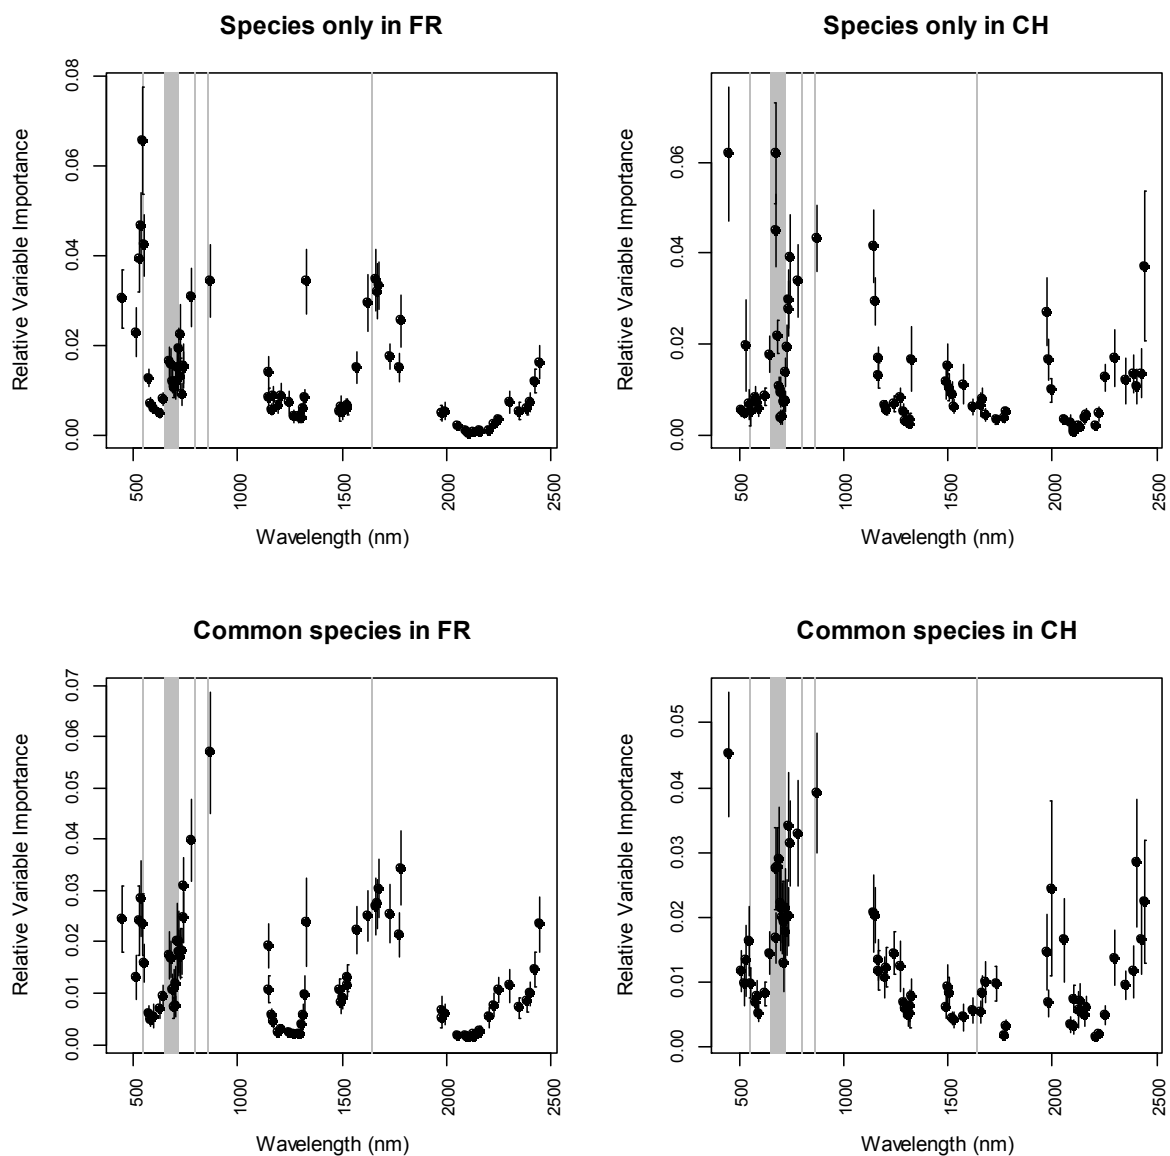

ESM2 Fig 1: Relative importance of reflectance intensity in spectral bands for predicting the distribution of species recorded only in the French site (FR), only in the Swiss site (CH), recorded in both sites but modeled in the French site and recorded in both sites but modeled in the Swiss site. Gray areas represent bands used for the calculation of the vegetation indices.

**2) Variable importance of vegetation indices for the French site (FR) and the Swiss site (CH).**

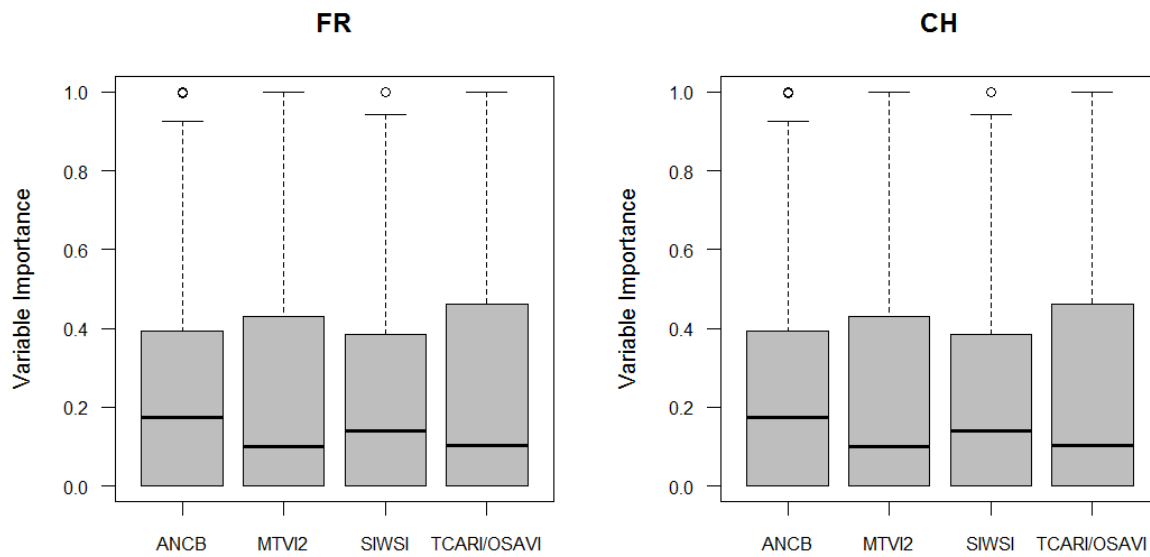

ESM2 Fig 2: Variable importance of the RS-retrieved vegetation indices for modeling species distribution. FR for the French site and CH for the Swiss site. Details on the calculation of indices can be found in ESM1.

**3) Detailed prediction accuracy of species distribution models.**

ESM 2 Table 1: Summary table of prediction accuracy of species distribution models assessed with the area under the curve of a receiver-operating characteristic plot: AUC. Topo indicates models based on topographic predictors only, BS models based on reflectance selected spectral bands. VI indicates models based on vegetation indices only. Topo+BS and Topo+VI indicate respectively models based on topographic predictors and reflectance or vegetation indices as predictors. Species are listed in alphabetic order according to their occurrence in the two sites. Green highlighting indicates species that showed at least 10% improvement of model accuracy when adding the AIS-predictors to topographic based models in at least one of the two sites. AUC values above 0.7 can be considered as models with good prediction accuracy.

|                                                    | Topo  |    | BS    |    | Topo+BS |    | VI    |    | Topo+VI |    |
|----------------------------------------------------|-------|----|-------|----|---------|----|-------|----|---------|----|
|                                                    | FR    | CH | FR    | CH | FR      | CH | FR    | CH | FR      | CH |
| <i>Achillea millefolium</i>                        | 0.686 | -  | 0.807 | -  | 0.811   | -  | 0.8   | -  | 0.827   | -  |
| <i>Achillea nana</i>                               | 0.8   | -  | 0.703 | -  | 0.783   | -  | 0.737 | -  | 0.746   | -  |
| <i>Alchemilla coriacea</i> sl.                     | 0.735 | -  | 0.707 | -  | 0.717   | -  | 0.721 | -  | 0.732   | -  |
| <i>Alchemilla pentaphyllea</i>                     | 0.893 | -  | 0.763 | -  | 0.897   | -  | 0.817 | -  | 0.884   | -  |
| <i>Alchemilla splendens</i>                        | 0.695 | -  | 0.682 | -  | 0.728   | -  | 0.664 | -  | 0.727   | -  |
| <i>Alopecurus alpinus</i>                          | 0.742 | -  | 0.607 | -  | 0.704   | -  | 0.668 | -  | 0.733   | -  |
| <i>Androsace adfinis</i> subsp. <i>brigantiaca</i> | 0.703 | -  | 0.65  | -  | 0.713   | -  | 0.719 | -  | 0.763   | -  |

|                                                     |              |   |       |   |              |   |       |   |              |   |
|-----------------------------------------------------|--------------|---|-------|---|--------------|---|-------|---|--------------|---|
| <b>Androsace vitaliana</b>                          | <b>0.666</b> | - | 0.785 | - | <b>0.786</b> | - | 0.786 | - | <b>0.76</b>  | - |
| <i>Antennaria carpatica</i>                         | 0.776        | - | 0.757 | - | 0.823        | - | 0.743 | - | 0.787        | - |
| <i>Antennaria dioica</i>                            | 0.783        | - | 0.675 | - | 0.783        | - | 0.639 | - | 0.737        | - |
| <i>Aster alpinus</i>                                | 0.703        | - | 0.689 | - | 0.664        | - | 0.662 | - | 0.711        | - |
| <i>Biscutella laevigata</i>                         | 0.795        | - | 0.631 | - | 0.722        | - | 0.627 | - | 0.755        | - |
| <i>Botrychium lunaria</i>                           | 0.681        | - | 0.704 | - | 0.679        | - | 0.722 | - | 0.711        | - |
| <i>Carduus defloratus</i> sl.                       | 0.852        | - | 0.796 | - | 0.817        | - | 0.751 | - | 0.836        | - |
| <i>Carex curvula</i> subsp. <i>rosae</i>            | 0.789        | - | 0.803 | - | 0.827        | - | 0.82  | - | 0.764        | - |
| <i>Carex foetida</i>                                | 0.78         | - | 0.655 | - | 0.721        | - | 0.67  | - | 0.763        | - |
| <b>Centaurea uniflora</b>                           | <b>0.781</b> | - | 0.8   | - | <b>0.864</b> | - | 0.779 | - | 0.837        | - |
| <i>Cerastium arvense</i> sl.                        | 0.677        | - | 0.581 | - | 0.663        | - | 0.592 | - | 0.689        | - |
| <i>Deschampsia flexuosa</i>                         | 0.658        | - | 0.653 | - | 0.597        | - | 0.729 | - | 0.657        | - |
| <i>Empetrum nigrum</i> subsp. <i>hermaphroditum</i> | 0.943        | - | 0.843 | - | 0.933        | - | 0.897 | - | 0.931        | - |
| <i>Erigeron uniflorus</i>                           | 0.656        | - | 0.664 | - | 0.66         | - | 0.672 | - | 0.673        | - |
| <i>Euphorbia cyparissias</i>                        | 0.832        | - | 0.785 | - | 0.842        | - | 0.755 | - | 0.852        | - |
| <i>Festuca laevigata</i>                            | 0.846        | - | 0.681 | - | 0.859        | - | 0.702 | - | 0.87         | - |
| <i>Festuca nigrescens</i>                           | 0.607        | - | 0.705 | - | 0.658        | - | 0.686 | - | 0.62         | - |
| <b>Festuca paniculata</b>                           | <b>0.741</b> | - | 0.746 | - | 0.782        | - | 0.783 | - | <b>0.839</b> | - |
| <i>Galium lucidum</i>                               | 0.776        | - | 0.66  | - | 0.746        | - | 0.613 | - | 0.765        | - |
| <i>Galium mollugo</i> subsp. <i>erectum</i>         | 0.87         | - | 0.756 | - | 0.848        | - | 0.73  | - | 0.874        | - |
| <i>Gentiana brachyphylla</i>                        | 0.882        | - | 0.664 | - | 0.859        | - | 0.736 | - | 0.903        | - |
| <i>Gentiana lutea</i>                               | 0.949        | - | 0.801 | - | 0.942        | - | 0.737 | - | 0.943        | - |
| <i>Gentiana punctata</i>                            | 0.709        | - | 0.706 | - | 0.708        | - | 0.692 | - | 0.71         | - |
| <i>Gentianella campestris</i>                       | 0.719        | - | 0.656 | - | 0.676        | - | 0.686 | - | 0.708        | - |
| <i>Geranium sylvaticum</i>                          | 0.775        | - | 0.796 | - | 0.801        | - | 0.82  | - | 0.821        | - |
| <i>Helianthemum grandiflorum</i>                    | 0.775        | - | 0.642 | - | 0.74         | - | 0.62  | - | 0.752        | - |
| <b>Helictotrichon sedenense</b>                     | <b>0.64</b>  | - | 0.858 | - | <b>0.839</b> | - | 0.849 | - | <b>0.837</b> | - |
| <i>Hieracium armerioides</i>                        | 0.633        | - | 0.692 | - | 0.666        | - | 0.72  | - | 0.645        | - |
| <i>Hieracium peleterianum</i>                       | 0.645        | - | 0.692 | - | 0.635        | - | 0.673 | - | 0.648        | - |
| <i>Hieracium villosum</i>                           | 0.616        | - | 0.608 | - | 0.645        | - | 0.613 | - | 0.597        | - |
| <i>Kobresia myosuroides</i>                         | 0.68         | - | 0.695 | - | 0.732        | - | 0.738 | - | 0.73         | - |
| <i>Laserpitium halleri</i>                          | 0.73         | - | 0.803 | - | 0.771        | - | 0.718 | - | 0.701        | - |
| <i>Laserpitium latifolium</i>                       | 0.864        | - | 0.852 | - | 0.908        | - | 0.82  | - | 0.87         | - |
| <b>Leucanthemopsis alpina</b>                       | <b>0.734</b> | - | 0.822 | - | <b>0.861</b> | - | 0.829 | - | <b>0.858</b> | - |
| <i>Lilium martagon</i>                              | 0.819        | - | 0.806 | - | 0.789        | - | 0.783 | - | 0.839        | - |
| <i>Lotus alpinus</i>                                | 0.626        | - | 0.624 | - | 0.628        | - | 0.602 | - | 0.615        | - |
| <i>Luzula lutea</i>                                 | 0.725        | - | 0.762 | - | 0.762        | - | 0.753 | - | 0.754        | - |
| <i>Luzula nutans</i>                                | 0.623        | - | 0.657 | - | 0.669        | - | 0.631 | - | 0.633        | - |
| <b>Meum athamanticum</b>                            | <b>0.829</b> | - | 0.919 | - | <b>0.931</b> | - | 0.881 | - | 0.888        | - |
| <i>Minuartia sedoides</i>                           | 0.783        | - | 0.77  | - | 0.806        | - | 0.779 | - | 0.767        | - |
| <b>Minuartia verna</b>                              | <b>0.753</b> | - | 0.824 | - | 0.817        | - | 0.821 | - | <b>0.896</b> | - |
| <i>Myosotis arvensis</i>                            | 0.85         | - | 0.859 | - | 0.876        | - | 0.822 | - | 0.847        | - |
| <i>Narcissus poeticus</i>                           | 0.935        | - | 0.875 | - | 0.951        | - | 0.886 | - | 0.942        | - |
| <i>Nigritella corneliana</i>                        | 0.615        | - | 0.592 | - | 0.622        | - | 0.631 | - | 0.621        | - |
| <i>Oxytropis lapponica</i>                          | 0.645        | - | 0.733 | - | 0.662        | - | 0.632 | - | 0.641        | - |

|                                                        |              |              |       |       |              |             |       |       |              |              |
|--------------------------------------------------------|--------------|--------------|-------|-------|--------------|-------------|-------|-------|--------------|--------------|
| <i>Pachypleurum mutellinoides</i>                      | 0.828        | -            | 0.831 | -     | 0.841        | -           | 0.797 | -     | 0.845        | -            |
| <i>Pedicularis rostratospicata</i>                     | 0.64         | -            | 0.592 | -     | 0.647        | -           | 0.624 | -     | 0.642        | -            |
| <i>Pedicularis tuberosa</i>                            | 0.748        | -            | 0.758 | -     | 0.786        | -           | 0.686 | -     | 0.765        | -            |
| <i>Phyteuma michelii</i>                               | 0.75         | -            | 0.686 | -     | 0.752        | -           | 0.66  | -     | 0.727        | -            |
| <i>Potentilla grandiflora</i>                          | 0.801        | -            | 0.768 | -     | 0.809        | -           | 0.735 | -     | 0.785        | -            |
| <i>Pulmonaria angustifolia</i>                         | 0.781        | -            | 0.781 | -     | 0.801        | -           | 0.779 | -     | 0.837        | -            |
| <i>Pulsatilla alpina</i> sl.                           | 0.566        | -            | 0.601 | -     | 0.574        | -           | 0.594 | -     | 0.584        | -            |
| <i>Ranunculus kuepferi</i>                             | 0.727        | -            | 0.612 | -     | 0.693        | -           | 0.6   | -     | 0.698        | -            |
| <i>Rhinanthus alectorolophus</i>                       | 0.864        | -            | 0.869 | -     | 0.932        | -           | 0.847 | -     | 0.926        | -            |
| <i>Rumex nebroides</i>                                 | 0.673        | -            | 0.726 | -     | 0.719        | -           | 0.746 | -     | 0.713        | -            |
| <b><i>Saxifraga paniculata</i></b>                     | <b>0.665</b> | -            | 0.843 | -     | <b>0.853</b> | -           | 0.861 | -     | <b>0.846</b> | -            |
| <i>Scutellaria alpina</i>                              | 0.864        | -            | 0.777 | -     | 0.894        | -           | 0.777 | -     | 0.879        | -            |
| <i>Sedum anacampseros</i>                              | 0.691        | -            | 0.643 | -     | 0.676        | -           | 0.705 | -     | 0.693        | -            |
| <b><i>Sempervivum arachnoideum</i></b>                 | <b>0.707</b> | -            | 0.75  | -     | 0.774        | -           | 0.798 | -     | <b>0.816</b> | -            |
| <i>Sempervivum montanum</i>                            | 0.752        | -            | 0.719 | -     | 0.754        | -           | 0.736 | -     | 0.795        | -            |
| <i>Sempervivum tectorum</i>                            | 0.745        | -            | 0.645 | -     | 0.756        | -           | 0.623 | -     | 0.776        | -            |
| <i>Senecio doronicum</i>                               | 0.841        | -            | 0.779 | -     | 0.826        | -           | 0.778 | -     | 0.83         | -            |
| <i>Senecio incanus</i>                                 | 0.683        | -            | 0.699 | -     | 0.662        | -           | 0.704 | -     | 0.667        | -            |
| <i>Sibbaldia procumbens</i>                            | 0.836        | -            | 0.721 | -     | 0.841        | -           | 0.858 | -     | 0.877        | -            |
| <i>Silene acaulis</i>                                  | 0.774        | -            | 0.832 | -     | 0.834        | -           | 0.848 | -     | 0.849        | -            |
| <i>Silene nutans</i>                                   | 0.683        | -            | 0.678 | -     | 0.669        | -           | 0.642 | -     | 0.633        | -            |
| <i>Silene vulgaris</i> sl.                             | 0.736        | -            | 0.813 | -     | 0.777        | -           | 0.711 | -     | 0.761        | -            |
| <i>Stachys pradica</i>                                 | 0.764        | -            | 0.669 | -     | 0.743        | -           | 0.672 | -     | 0.74         | -            |
| <i>Taraxacum alpinum</i>                               | 0.64         | -            | 0.631 | -     | 0.613        | -           | 0.644 | -     | 0.661        | -            |
| <i>Trifolium alpestre</i>                              | 0.874        | -            | 0.88  | -     | 0.916        | -           | 0.856 | -     | 0.942        | -            |
| <i>Trifolium alpinum</i>                               | 0.606        | -            | 0.69  | -     | 0.661        | -           | 0.655 | -     | 0.651        | -            |
| <b><i>Trifolium montanum</i></b>                       | <b>0.824</b> | -            | 0.833 | -     | <b>0.92</b>  | -           | 0.836 | -     | <b>0.915</b> | -            |
| <i>Trisetum flavescens</i>                             | 0.888        | -            | 0.871 | -     | 0.925        | -           | 0.886 | -     | 0.932        | -            |
| <i>Vaccinium uliginosum</i> subsp. <i>microphyllum</i> | 0.841        | -            | 0.798 | -     | 0.86         | -           | 0.811 | -     | 0.841        | -            |
| <i>Veronica allionii</i>                               | 0.708        | -            | 0.619 | -     | 0.689        | -           | 0.665 | -     | 0.697        | -            |
| <i>Alchemilla xanthochlora</i> aggr                    | 0.629        | 0.601        | 0.612 | 0.603 | 0.608        | 0.588       | 0.59  | 0.636 | 0.617        | 0.631        |
| <i>Anthoxanthum odoratum</i> aggr                      | 0.591        | 0.704        | 0.624 | 0.641 | 0.628        | 0.671       | 0.618 | 0.638 | 0.629        | 0.68         |
| <i>Anthyllis vulneraria</i> sl.                        | 0.681        | 0.75         | 0.624 | 0.66  | 0.666        | 0.727       | 0.616 | 0.65  | 0.662        | 0.75         |
| <i>Arnica montana</i>                                  | 0.828        | 0.617        | 0.802 | 0.66  | 0.83         | 0.659       | 0.758 | 0.71  | 0.822        | 0.645        |
| <b><i>Bartsia alpina</i></b>                           | <b>0.699</b> | 0.629        | 0.657 | 0.705 | <b>0.769</b> | 0.658       | 0.641 | 0.643 | 0.71         | 0.645        |
| <i>Campanula scheuchzeri</i>                           | 0.641        | 0.643        | 0.685 | 0.709 | 0.685        | 0.681       | 0.698 | 0.651 | 0.661        | 0.629        |
| <i>Carex sempervirens</i>                              | 0.628        | 0.76         | 0.608 | 0.648 | 0.598        | 0.755       | 0.605 | 0.655 | 0.596        | 0.709        |
| <i>Carlina acaulis</i> subsp. <i>caulescens</i>        | 0.81         | 0.723        | 0.786 | 0.744 | 0.823        | 0.771       | 0.791 | 0.691 | 0.853        | 0.783        |
| <i>Cirsium spinosissimum</i>                           | 0.681        | 0.671        | 0.629 | 0.681 | 0.7          | 0.71        | 0.688 | 0.686 | 0.742        | 0.735        |
| <b><i>Dryas octopetala</i></b>                         | <b>0.769</b> | 0.694        | 0.812 | 0.71  | <b>0.847</b> | 0.733       | 0.816 | 0.685 | <b>0.881</b> | 0.697        |
| <b><i>Festuca rubra</i> aggr.</b>                      | 0.681        | <b>0.658</b> | 0.706 | 0.76  | 0.711        | <b>0.79</b> | 0.709 | 0.716 | 0.693        | 0.706        |
| <i>Festuca violacea</i> aggr.                          | 0.609        | 0.634        | 0.608 | 0.608 | 0.586        | 0.599       | 0.595 | 0.63  | 0.62         | 0.642        |
| <i>Gentiana acaulis</i>                                | 0.729        | 0.72         | 0.709 | 0.68  | 0.758        | 0.72        | 0.645 | 0.693 | 0.737        | 0.738        |
| <b><i>Geum montanum</i></b>                            | 0.645        | <b>0.603</b> | 0.593 | 0.709 | 0.607        | <b>0.68</b> | 0.579 | 0.758 | 0.638        | <b>0.687</b> |
| <i>Homogyne alpina</i>                                 | 0.896        | 0.615        | 0.799 | 0.625 | 0.878        | 0.656       | 0.81  | 0.605 | 0.901        | 0.623        |

|                                                 |       |       |       |       |       |       |       |       |       |       |
|-------------------------------------------------|-------|-------|-------|-------|-------|-------|-------|-------|-------|-------|
| <i>Leontodon helveticus</i>                     | 0.59  | 0.677 | 0.666 | 0.746 | 0.642 | 0.772 | 0.663 | 0.71  | 0.615 | 0.715 |
| <i>Leontodon hispidus</i> sl.                   | 0.802 | 0.659 | 0.8   | 0.645 | 0.818 | 0.699 | 0.735 | 0.61  | 0.859 | 0.665 |
| <i>Lotus corniculatus</i> aggr.                 | 0.862 | 0.616 | 0.71  | 0.608 | 0.859 | 0.608 | 0.713 | 0.601 | 0.901 | 0.61  |
| <i>Myosotis alpestris</i>                       | 0.672 | 0.729 | 0.713 | 0.639 | 0.735 | 0.664 | 0.735 | 0.608 | 0.753 | 0.693 |
| <i>Nardus stricta</i>                           | 0.654 | 0.613 | 0.624 | 0.659 | 0.644 | 0.655 | 0.625 | 0.667 | 0.641 | 0.647 |
| <i>Phleum rhaeticum</i>                         | 0.68  | 0.683 | 0.75  | 0.576 | 0.724 | 0.682 | 0.718 | 0.653 | 0.692 | 0.701 |
| <i>Phyteuma orbiculare</i>                      | 0.631 | 0.66  | 0.614 | 0.62  | 0.603 | 0.626 | 0.625 | 0.614 | 0.578 | 0.638 |
| <i>Plantago alpina</i>                          | 0.619 | 0.618 | 0.621 | 0.621 | 0.619 | 0.631 | 0.671 | 0.59  | 0.635 | 0.588 |
| <i>Poa alpina</i>                               | 0.788 | 0.647 | 0.619 | 0.633 | 0.795 | 0.655 | 0.625 | 0.627 | 0.764 | 0.64  |
| <i>Polygonum viviparum</i>                      | 0.718 | 0.652 | 0.653 | 0.685 | 0.698 | 0.691 | 0.722 | 0.615 | 0.743 | 0.655 |
| <i>Potentilla aurea</i>                         | 0.625 | 0.612 | 0.669 | 0.746 | 0.659 | 0.75  | 0.571 | 0.745 | 0.596 | 0.725 |
| <i>Ranunculus acris</i> sl.                     | 0.664 | 0.68  | 0.748 | 0.665 | 0.748 | 0.662 | 0.803 | 0.731 | 0.799 | 0.681 |
| <i>Ranunculus montanus</i> aggr.                | 0.684 | 0.599 | 0.745 | 0.652 | 0.744 | 0.642 | 0.727 | 0.714 | 0.781 | 0.677 |
| <i>Salix herbacea</i>                           | 0.741 | 0.655 | 0.781 | 0.686 | 0.818 | 0.639 | 0.791 | 0.62  | 0.811 | 0.669 |
| <i>Sesleria caerulea</i>                        | 0.666 | 0.655 | 0.752 | 0.705 | 0.737 | 0.718 | 0.797 | 0.671 | 0.783 | 0.713 |
| <i>Thesium alpinum</i>                          | 0.71  | 0.66  | 0.793 | 0.781 | 0.791 | 0.747 | 0.84  | 0.718 | 0.788 | 0.678 |
| <i>Thymus praecox</i> subsp. <i>polytrichus</i> | 0.771 | 0.649 | 0.694 | 0.748 | 0.803 | 0.717 | 0.655 | 0.757 | 0.756 | 0.649 |
| <i>Trifolium pratense</i> sl.                   | 0.759 | 0.592 | 0.66  | 0.75  | 0.72  | 0.731 | 0.67  | 0.697 | 0.732 | 0.678 |
| <i>Trifolium repens</i> sstr.                   | 0.651 | 0.747 | 0.609 | 0.691 | 0.611 | 0.746 | 0.639 | 0.786 | 0.673 | 0.749 |
| <i>Trifolium thalii</i>                         | 0.623 | 0.606 | 0.66  | 0.612 | 0.612 | 0.607 | 0.635 | 0.606 | 0.634 | 0.616 |
| <i>Vaccinium myrtillus</i>                      | 0.882 | 0.647 | 0.801 | 0.671 | 0.858 | 0.623 | 0.779 | 0.643 | 0.848 | 0.659 |
| <i>Viola calcarata</i>                          | 0.627 | 0.68  | 0.613 | 0.614 | 0.624 | 0.616 | 0.624 | 0.737 | 0.622 | 0.628 |
| <i>Agrostis capillaris</i>                      | -     | 0.66  | -     | 0.771 | -     | 0.774 | -     | 0.793 | -     | 0.852 |
| <i>Agrostis rupestris</i>                       | -     | 0.685 | -     | 0.762 | -     | 0.721 | -     | 0.598 | -     | 0.666 |
| <i>Alchemilla conjuncta</i> aggr.               | -     | 0.599 | -     | 0.684 | -     | 0.697 | -     | 0.669 | -     | 0.629 |
| <i>Alchemilla glabra</i> aggr.                  | -     | 0.671 | -     | 0.736 | -     | 0.705 | -     | 0.619 | -     | 0.66  |
| <i>Alchemilla vulgaris</i> aggr.                | -     | 0.74  | -     | 0.634 | -     | 0.65  | -     | 0.655 | -     | 0.674 |
| <i>Androsace chamaejasme</i>                    | -     | 0.658 | -     | 0.602 | -     | 0.643 | -     | 0.61  | -     | 0.646 |
| <i>Aposeris foetida</i>                         | -     | 0.788 | -     | 0.714 | -     | 0.818 | -     | 0.692 | -     | 0.838 |
| <i>Aster bellidiastrum</i>                      | -     | 0.705 | -     | 0.646 | -     | 0.741 | -     | 0.657 | -     | 0.758 |
| <i>Campanula barbata</i>                        | -     | 0.703 | -     | 0.789 | -     | 0.745 | -     | 0.787 | -     | 0.72  |
| <i>Carex ornithopoda</i>                        | -     | 0.707 | -     | 0.638 | -     | 0.68  | -     | 0.612 | -     | 0.677 |
| <i>Cerastium fontanum</i> sl.                   | -     | 0.682 | -     | 0.684 | -     | 0.706 | -     | 0.683 | -     | 0.685 |
| <i>Crepis aurea</i>                             | -     | 0.634 | -     | 0.716 | -     | 0.639 | -     | 0.636 | -     | 0.597 |
| <i>Crocus albiflorus</i>                        | -     | 0.744 | -     | 0.733 | -     | 0.769 | -     | 0.727 | -     | 0.781 |
| <i>Deschampsia cespitosa</i>                    | -     | 0.683 | -     | 0.715 | -     | 0.726 | -     | 0.773 | -     | 0.754 |
| <i>Euphrasia minima</i>                         | -     | 0.585 | -     | 0.66  | -     | 0.624 | -     | 0.6   | -     | 0.606 |
| <i>Festuca quadriflora</i>                      | -     | 0.634 | -     | 0.767 | -     | 0.737 | -     | 0.679 | -     | 0.647 |
| <i>Galium anisophyllum</i>                      | -     | 0.767 | -     | 0.609 | -     | 0.753 | -     | 0.713 | -     | 0.771 |
| <i>Gentiana campestris</i> sstr.                | -     | 0.705 | -     | 0.597 | -     | 0.665 | -     | 0.65  | -     | 0.673 |
| <i>Gentiana purpurea</i>                        | -     | 0.62  | -     | 0.81  | -     | 0.797 | -     | 0.788 | -     | 0.746 |
| <i>Gentiana verna</i>                           | -     | 0.682 | -     | 0.681 | -     | 0.663 | -     | 0.674 | -     | 0.646 |
| <i>Helianthemum nummularium</i> sl.             | -     | 0.631 | -     | 0.631 | -     | 0.627 | -     | 0.638 | -     | 0.624 |
| <i>Helictotrichon versicolor</i>                | -     | 0.627 | -     | 0.607 | -     | 0.615 | -     | 0.597 | -     | 0.605 |
| <i>Hieracium lactucella</i>                     | -     | 0.648 | -     | 0.755 | -     | 0.761 | -     | 0.771 | -     | 0.748 |

|                                   |   |       |   |       |   |       |   |       |   |       |
|-----------------------------------|---|-------|---|-------|---|-------|---|-------|---|-------|
| <i>Leucanthemum vulgare</i> aggr. | - | 0.864 | - | 0.756 | - | 0.888 | - | 0.707 | - | 0.911 |
| <i>Ligusticum mutellina</i>       | - | 0.624 | - | 0.677 | - | 0.671 | - | 0.741 | - | 0.698 |
| <i>Loiseleuria procumbens</i>     | - | 0.66  | - | 0.639 | - | 0.601 | - | 0.635 | - | 0.624 |
| <i>Luzula alpinopilosa</i>        | - | 0.671 | - | 0.69  | - | 0.681 | - | 0.711 | - | 0.688 |
| <i>Luzula multiflora</i>          | - | 0.715 | - | 0.582 | - | 0.643 | - | 0.608 | - | 0.684 |
| <i>Pedicularis verticillata</i>   | - | 0.682 | - | 0.657 | - | 0.693 | - | 0.627 | - | 0.681 |
| <i>Plantago atrata</i> sstr.      | - | 0.6   | - | 0.614 | - | 0.607 | - | 0.605 | - | 0.593 |
| <i>Polygala alpestris</i>         | - | 0.633 | - | 0.643 | - | 0.637 | - | 0.702 | - | 0.615 |
| <i>Potentilla crantzii</i>        | - | 0.639 | - | 0.67  | - | 0.635 | - | 0.657 | - | 0.625 |
| <i>Prunella vulgaris</i>          | - | 0.683 | - | 0.622 | - | 0.661 | - | 0.63  | - | 0.634 |
| <i>Salix retusa</i>               | - | 0.68  | - | 0.688 | - | 0.764 | - | 0.661 | - | 0.748 |
| <i>Scabiosa lucida</i>            | - | 0.647 | - | 0.678 | - | 0.727 | - | 0.607 | - | 0.633 |
| <i>Soldanella alpina</i>          | - | 0.642 | - | 0.717 | - | 0.717 | - | 0.683 | - | 0.677 |
| <i>Taraxacum officinale</i> aggr. | - | 0.757 | - | 0.627 | - | 0.685 | - | 0.761 | - | 0.681 |
| <i>Trifolium badium</i>           | - | 0.689 | - | 0.696 | - | 0.666 | - | 0.695 | - | 0.66  |
| <i>Trollius europaeus</i>         | - | 0.667 | - | 0.812 | - | 0.8   | - | 0.715 | - | 0.75  |
| <i>Vaccinium gaultherioides</i>   | - | 0.633 | - | 0.648 | - | 0.641 | - | 0.624 | - | 0.647 |
| <i>Vaccinium vitis-idaea</i>      | - | 0.705 | - | 0.666 | - | 0.674 | - | 0.644 | - | 0.723 |

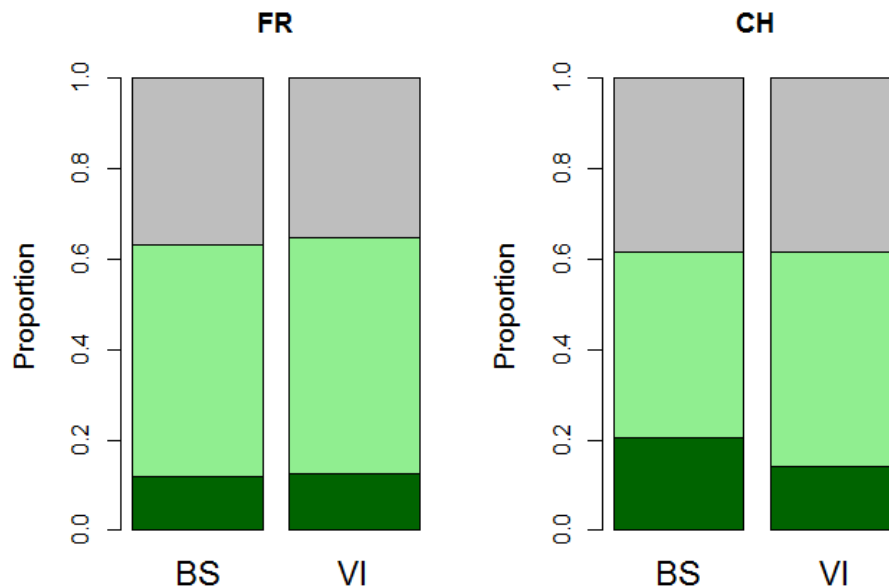

ESM2 Fig 3: Proportions of species distribution models for which accuracy was improved by 10% (dark green areas) or between 0 and 10% (light green areas) or was declined (gray areas) when adding the AIS-predictors to topographic based models. FR for the French site and CH for the Swiss site. BS indicates reflectance records in spectral bands as predictors and VI indicates vegetation indices as predictors. See ESM2 Table 1 for identity of the species that showed best model improvement.

Weak or no improvement of species distribution models, when including AIS-predictors, suggests that the ecological information represented by AIS-data was redundant to already included topography indicators. Increasing the dimensionality of the set of predictors without additional informational content may flaw the fitted statistical relationships and ultimately decrease model accuracy as we observed for many species at both sites.

#### 4) The effect of species abundance patterns on the prediction accuracy of remote sensing-based species distribution models.

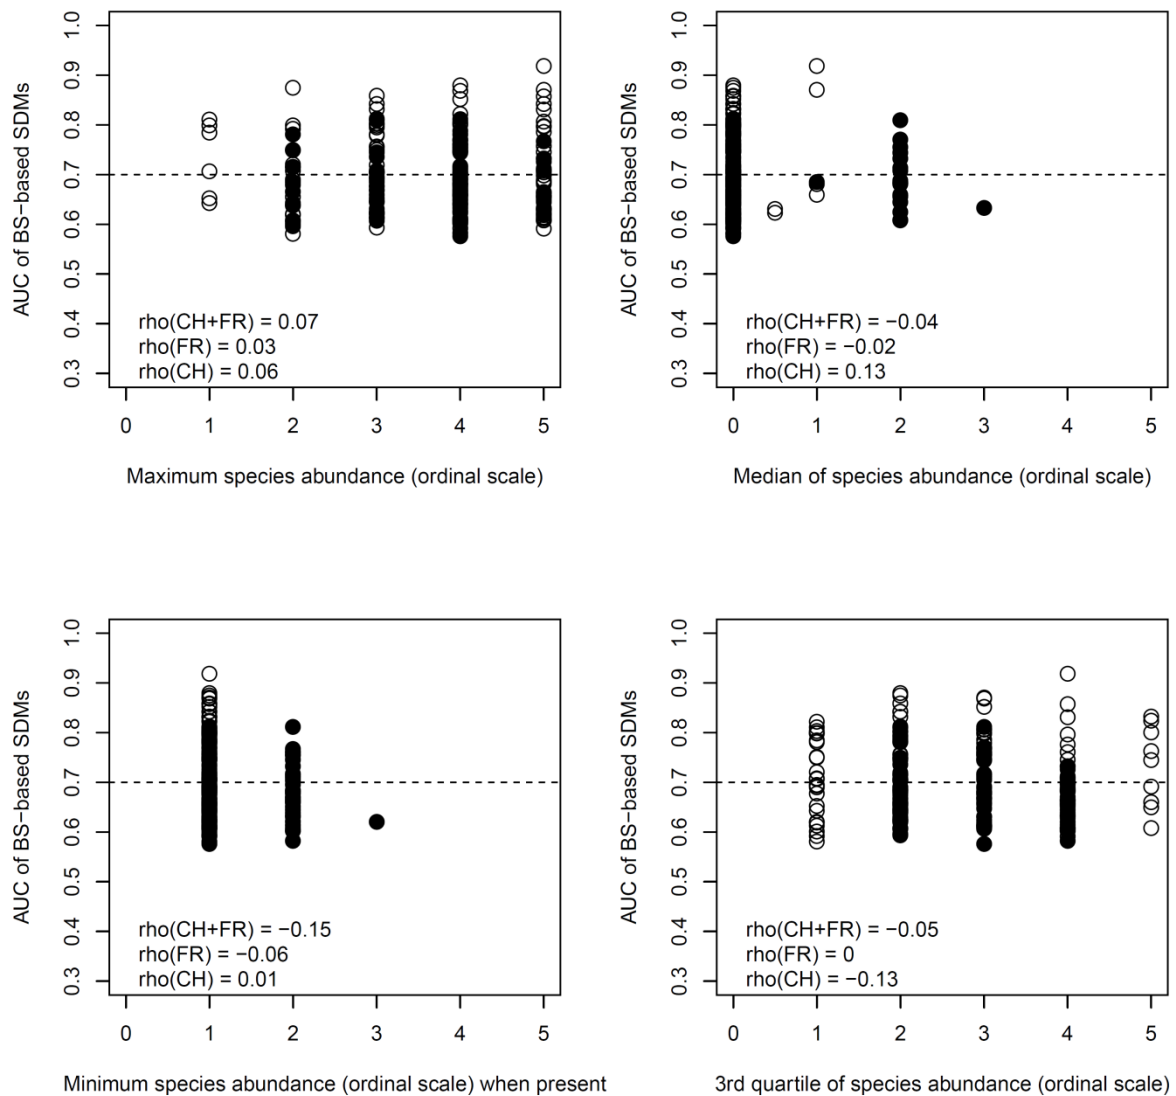

ESM2 Fig 4: Relationships between four predictors of species abundance patterns and the accuracy of species distribution models based on the reflectance records in spectral bands (BS). White points for species from the French site (FR) and black points for species from the Swiss site (CH).

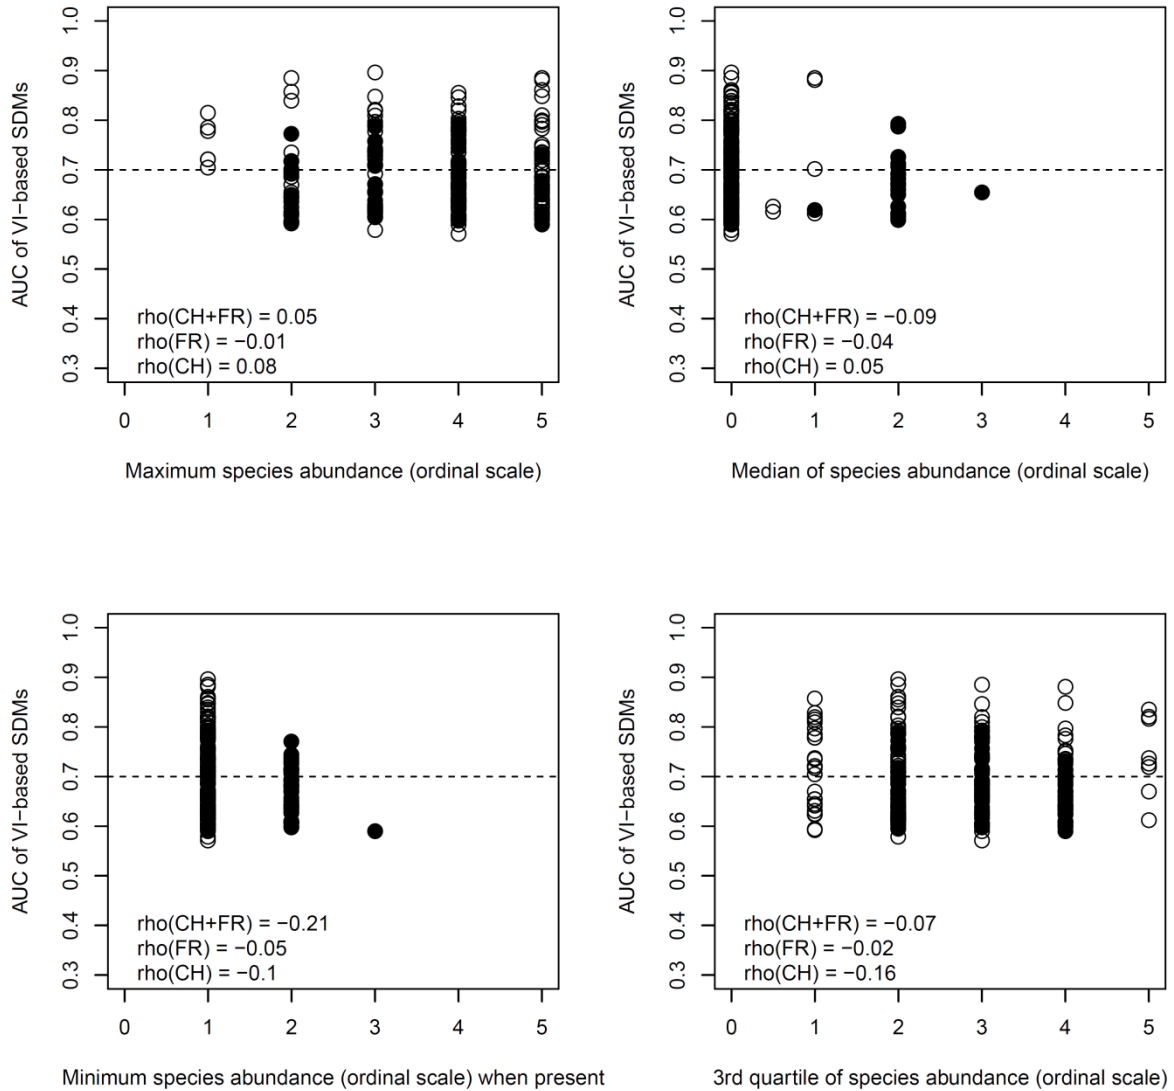

ESM2 Fig 5: Relationships between four predictors of species abundance patterns and the accuracy of species distribution models based on the vegetation indices. White points for species from the French site (FR) and black points for species from the Swiss site (CH).



## 5) Testing the phylogenetic and functional dependency of model features between the species.

We implemented a similar procedure as for the test of phylogenetic signal of species traits, except we considered the AUC values and AIS-predictor importance as traits and we sought for both phylogenetic and functional signals. Specifically, we implemented two complementary analyses following recommendations of Hardy and Pavoine 2012 [1]. In the first, we computed a global Mantel test contrasting dissimilarity of species distribution models (Euclidean distance between AUC values or AIS-variable importance) and phylogenetic or functional dissimilarity between the species. The randomisation procedure consisted of random reallocation of AUC values or variable importance between the species (999 permutations). In the second, we computed distograms where species model dissimilarities (again as Euclidean distance between AUC values or AIS-variable importance) are plotted against classes of phylogenetic or functional distance between the species. This indicates how species models differ for functionally/phylogenetically closely related species and for dissimilar species.

Phylogenetic information for the French site was extracted from the complete phylogeny for the Alpine flora at the genus level published in Thuiller et al. 2014 [2]. Finally, we randomly resolved terminal polytomies by applying a birth-death (Yule) bifurcation process within each genus [3]. Phylogenetic information for the Swiss site was extracted from the phylogeny for the 231 most frequent species of the Western Swiss Alps of the Canton of Vaud (a 700 km<sup>2</sup> region surrounding the Swiss site Anzeindaz). This phylogeny is based on DNA sequences extracted from collected vegetal material and built by alignment of chloroplastic DNA sequences (*rbcl* and *matK*) with GTR + gamma models of evolution under a Bayesian inference framework. Details are available in Ndiribe et al. 2013 [4].

All the species of the French site (i.e. 119) were included in phylogenetic tests while 69 species of the Swiss site (on 78) could be accounted for.

The phylogenetic distance between the species was quantified using the Abouheif proximity measure for Mantel tests and the square-root of patristic distance for distograms [1].

Traits information included morphological and physiological traits that are acknowledged to indicate plant fitness, community dynamics and ecosystem processes. Some of them are also recognized to be related to the reflectance pattern of vegetation stands [5,6]. We considered: 1) specific leaf area (SLA; m<sup>2</sup>.kg<sup>-1</sup>), 2) leaf dry matter content (LDMC, mg.g<sup>-1</sup>), 3) vegetation

height (mm), 4) plant growth form discriminating species as graminoid, forb, legume or shrub, 5) Leaf distribution along the stem discriminating species with leaves growing regularly along the stem, rosette or tufted species and semi rosette species, and 6) branching, a binary trait describing species ability to fill lateral space. SLA, LDMC and vegetation height were measured for most species in the field within each of the two sites (89 out 119 for FR and 71 out of 78 for CH). Leaf distribution, growth form, and branching were retrieved from the LEDA database [7]. Since trait data covered continuous and categorical variables, the functional dissimilarity between species was quantified using the Gower distance metric [8] for both Mantel tests and distogram computation.

Tests for phylogenetic and functional dependency of the importance of AIS-variables considered only the species that showed distribution models with fair to good prediction accuracy (i.e.  $AUC > 0.7$ ) in order to exclude spurious estimates of variable importance from inaccurate models. This led to analyses with reduced list of species as follows:

| Number of species included in the analyses | FR                          |                          | CH                        |                         |
|--------------------------------------------|-----------------------------|--------------------------|---------------------------|-------------------------|
|                                            | Phylogenetic<br>(119/119sp) | Functional<br>(89/119sp) | Phylogenetic<br>(69/78sp) | Functional<br>(71/78sp) |
| Reflectance in spectral bands              | 64                          | 47                       | 25                        | 25                      |
| Vegetation indices                         | 68                          | 50                       | 19                        | 20                      |

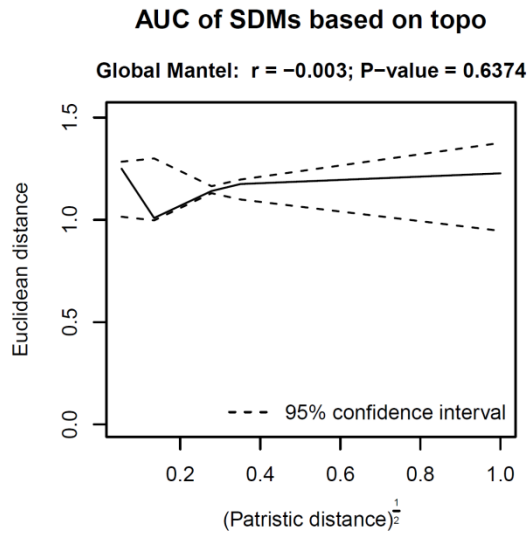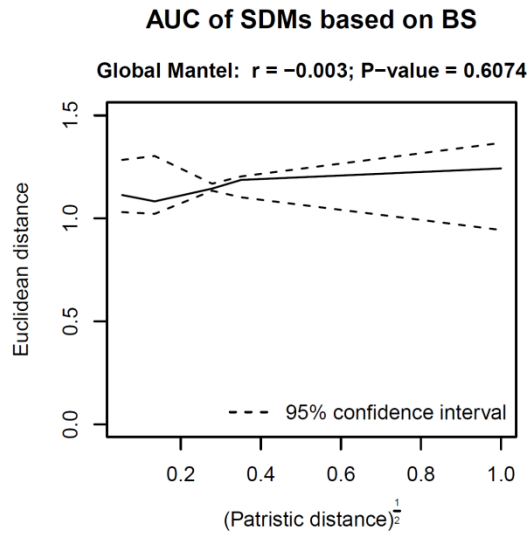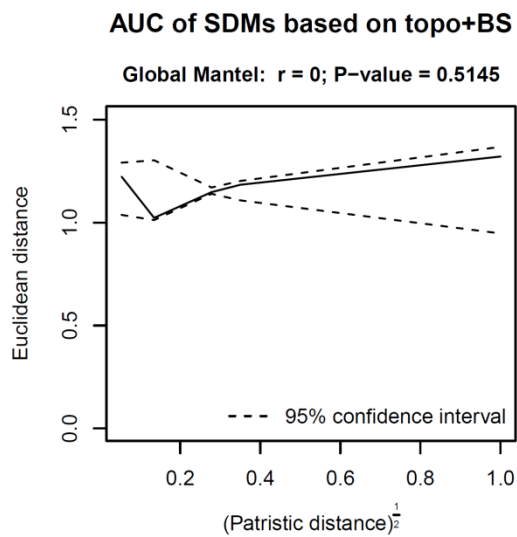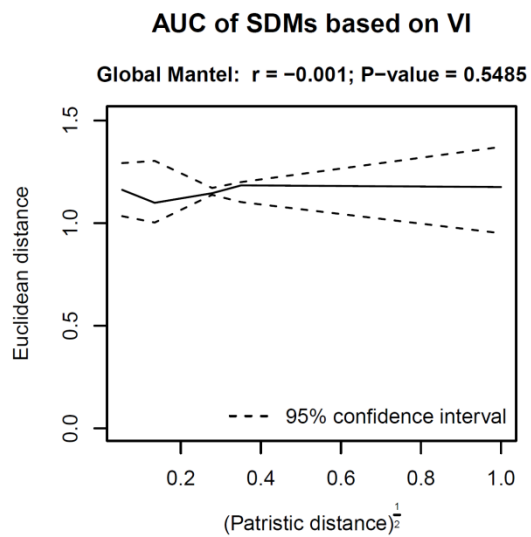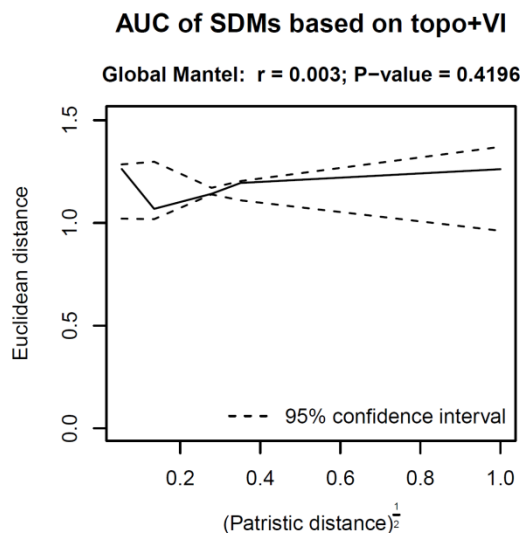

ESM2 Fig 6: **Phylogenetic dependency of model accuracy** (AUC: the area under the curve of a receiver-operating characteristic plot) between the species for the **French site (FR)**. The x-axis represents the phylogenetic distance between the species and the y-axis differences in AUC. Topo indicates models based on topographic predictors only, BS models based on reflectance recorded in the spectral bands. VI indicates models based on vegetation indices only. Topo+BS and Topo+VI indicate respectively models based on topographic predictors and reflectance records in spectral bands or vegetation indices as predictors. Confidence intervals were computed with random re-allocation of AUC values between the species (9999 permutations)

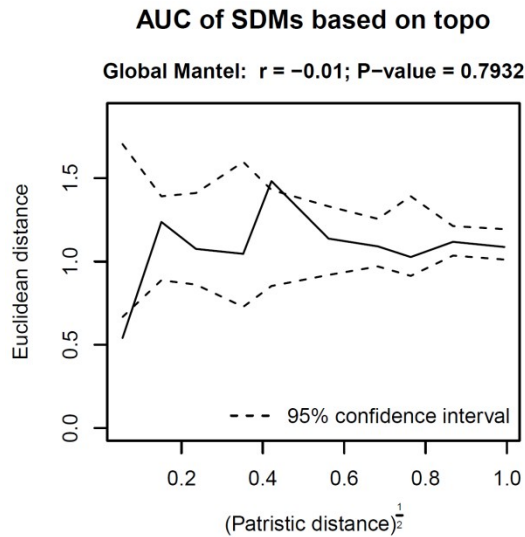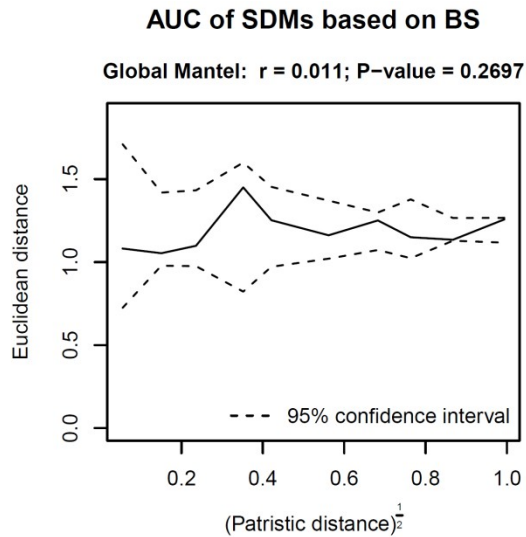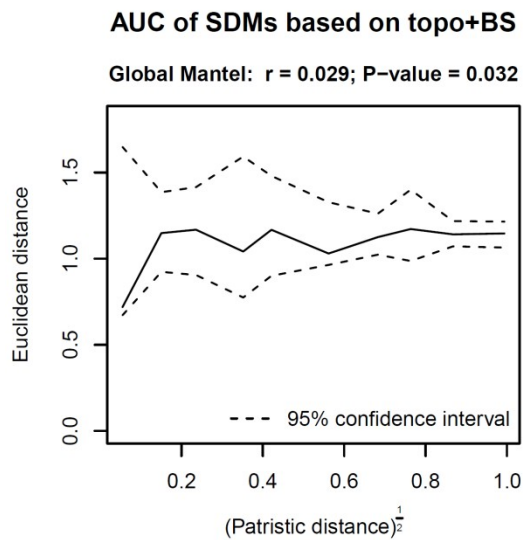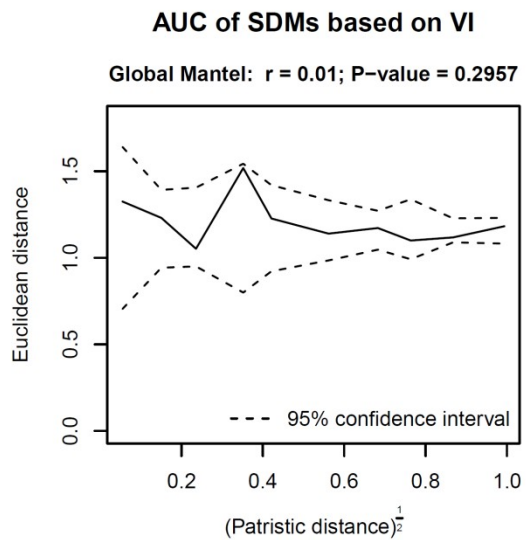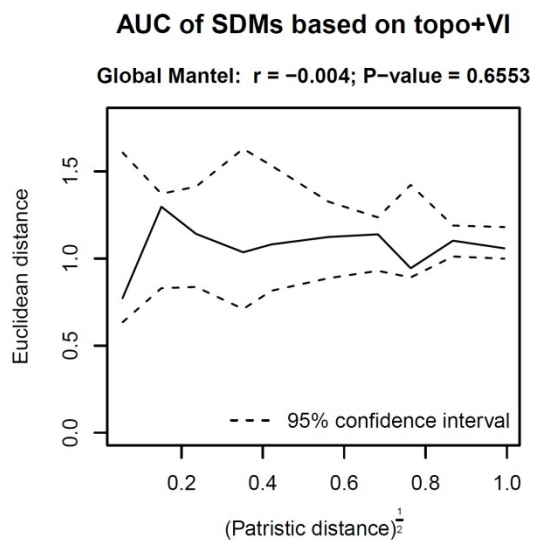

**ESM2 Fig 7: Phylogenetic dependency of model accuracy**  
(AUC: the area under the curve of a receiver-operating characteristic plot) between the species for the **Swiss site (CH)**. The x-axis represents the phylogenetic distance between the species and the y-axis differences in AUC. Topo indicates models based on topographic predictors only, BS models based on reflectance recorded in the spectral bands. VI indicates models based on vegetation indices only. Topo+BS and Topo+VI indicate respectively models based on topographic predictors and reflectance records in spectral bands or vegetation indices as predictors. Confidence intervals were computed with random re-allocation of AUC values between the species (9999 permutations)

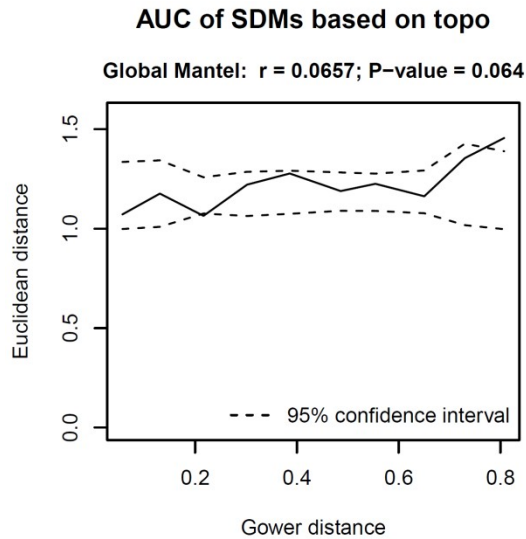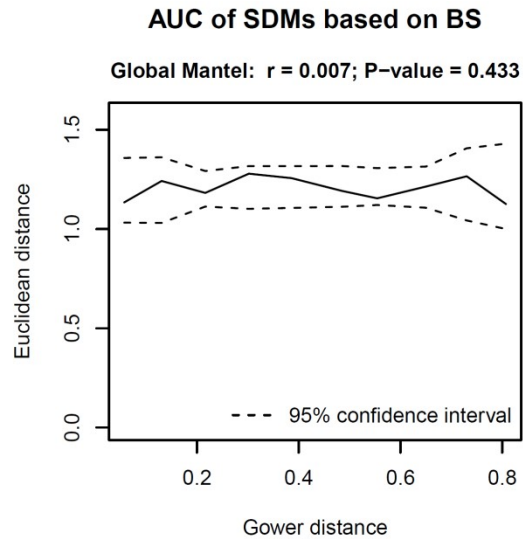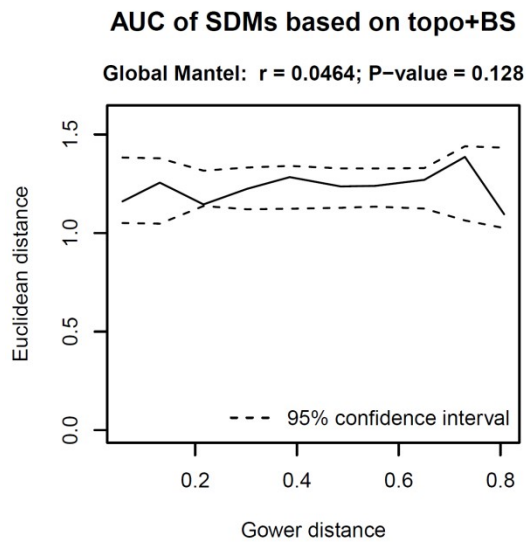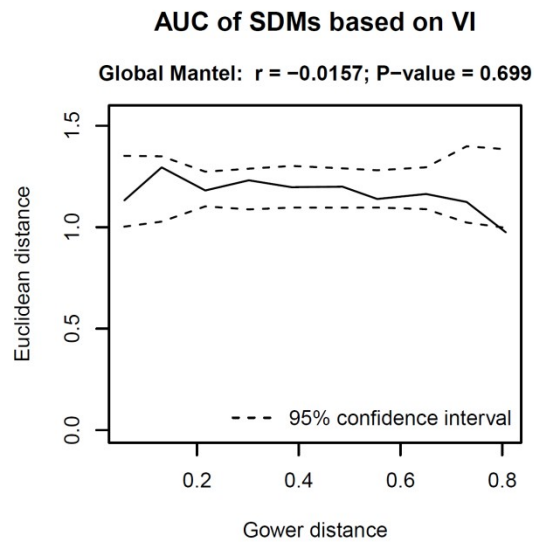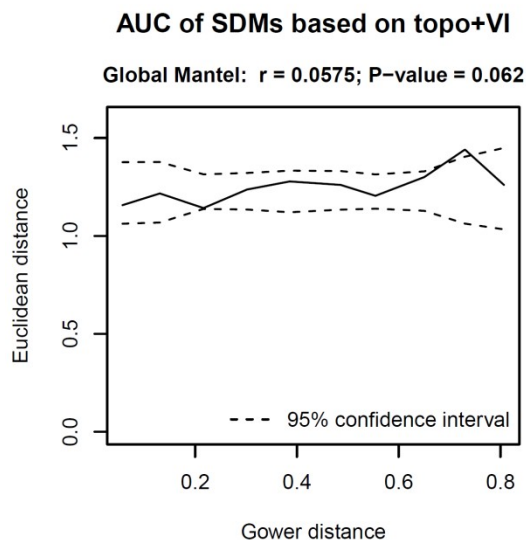

ESM2 Fig 8: **Functional dependency of model accuracy** (AUC: the area under the curve of a receiver-operating characteristic plot) between the species for the **French site (FR)**. The x-axis represents the functional distance between the species and the y-axis differences in AUC. Topo indicates models based on topographic predictors only, BS models based on reflectance recorded in the spectral bands. VI indicates models based on vegetation indices only. Topo+BS and Topo+VI indicate respectively models based on topographic predictors and reflectance records in spectral bands or vegetation indices as predictors. Confidence intervals were computed with random re-allocation of AUC values between the species (9999 permutations)

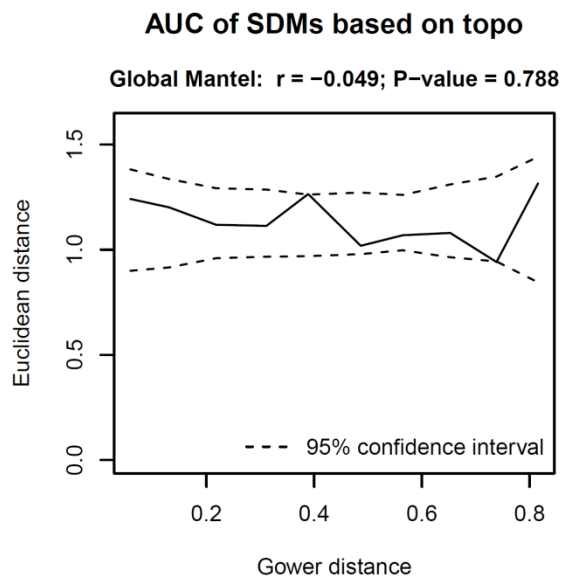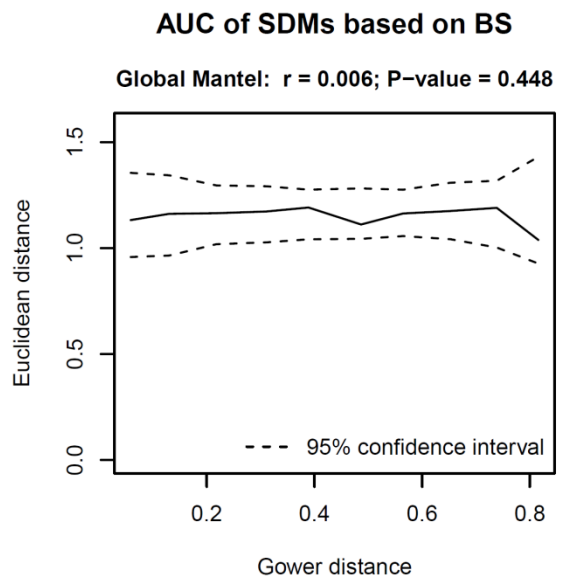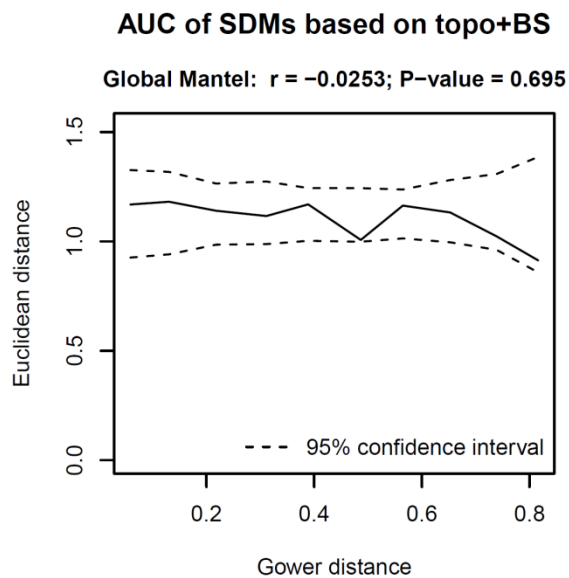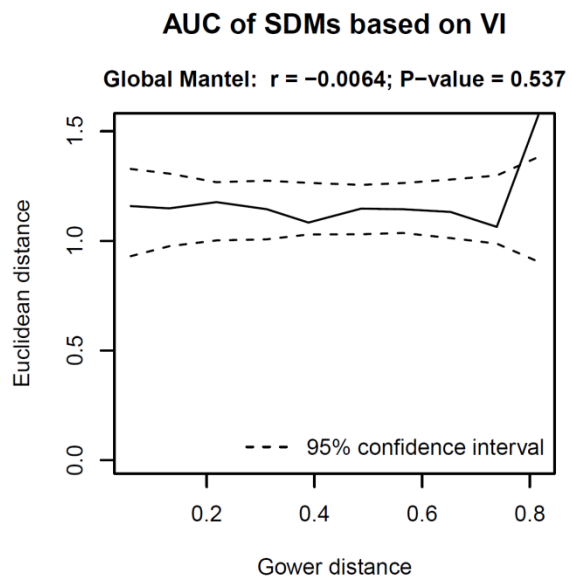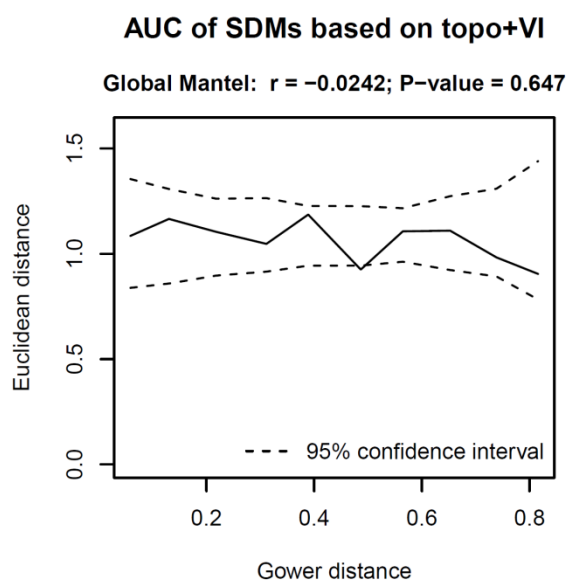

ESM2 Fig 9: **Functional dependency of model accuracy** (AUC: the area under the curve of a receiver-operating characteristic plot) between the species for the **Swiss site (CH)**. The x-axis represents the functional distance between the species and the y-axis differences in AUC. Topo indicates models based on topographic predictors only, BS models based on reflectance recorded in the spectral bands. VI indicates models based on vegetation indices only. Topo+BS and Topo+VI indicate respectively models based on topographic predictors and reflectance records in spectral bands or vegetation indices as predictors. Confidence intervals were computed with random re-allocation of AUC values between the species (9999 permutations)

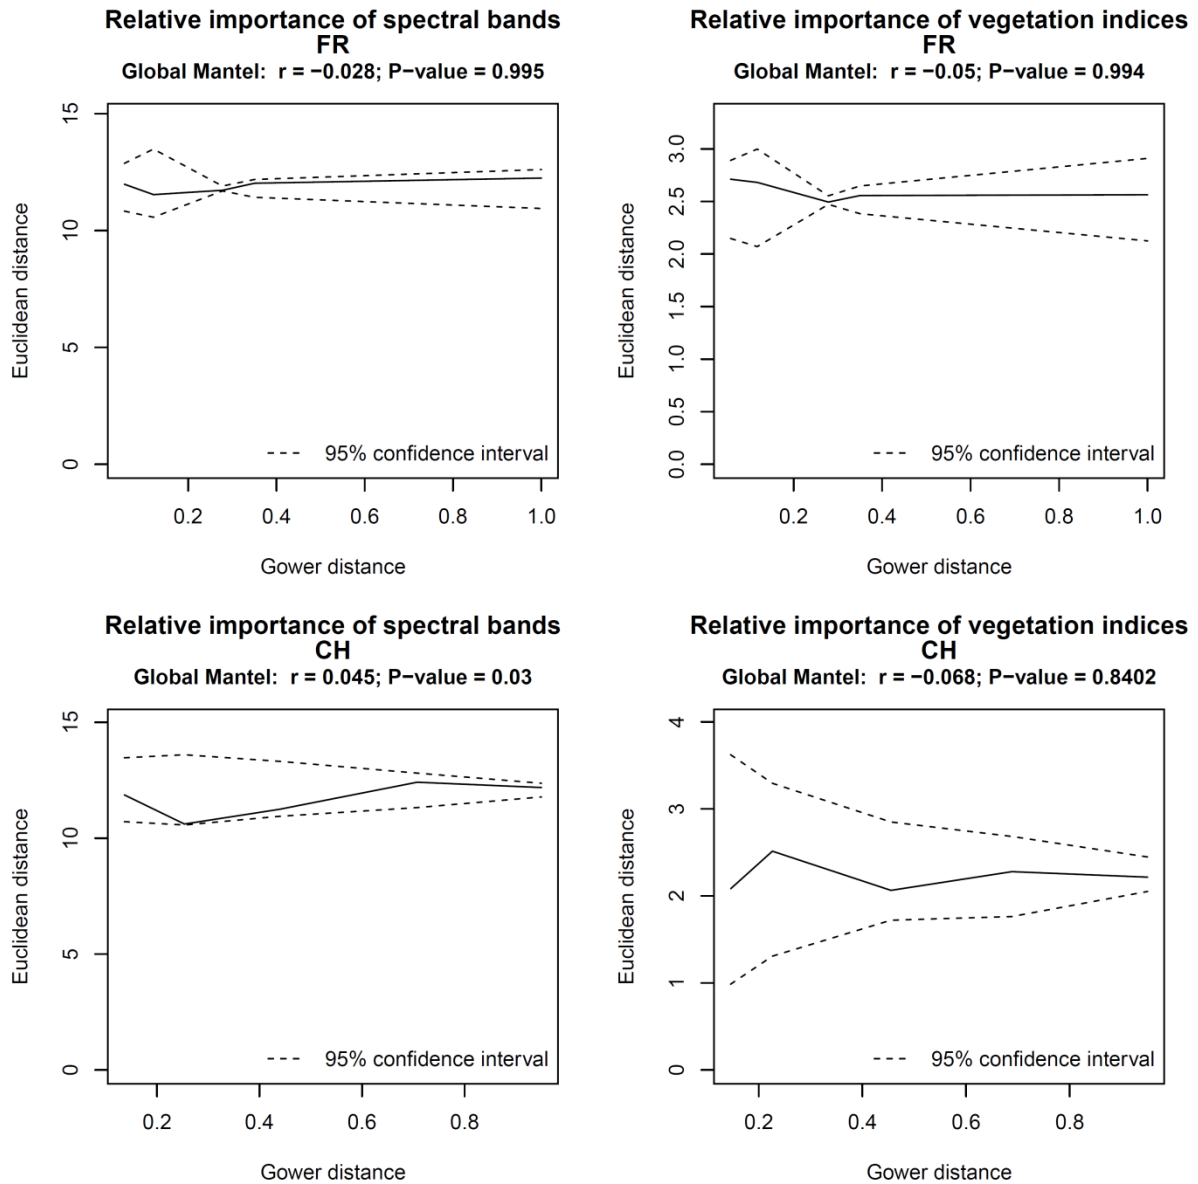

ESM2 Fig 10: **Phylogenetic dependency of relative importance of AIS-predictors** between the species for both the French site (FR) and the Swiss site (CH). The x-axis represents the phylogenetic distance between the species and the y-axis differences in RS-predictors (either reflectance recorded in the spectral bands or vegetation indices). Only species with distribution models showing fair to good prediction accuracy ( $AUC > 0.7$ ) were considered. Confidence intervals were computed with random re-allocation of predictor importance between the species (9999 permutations)

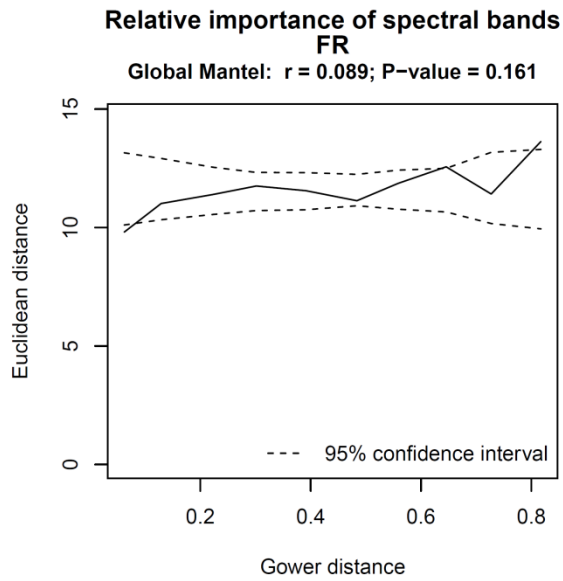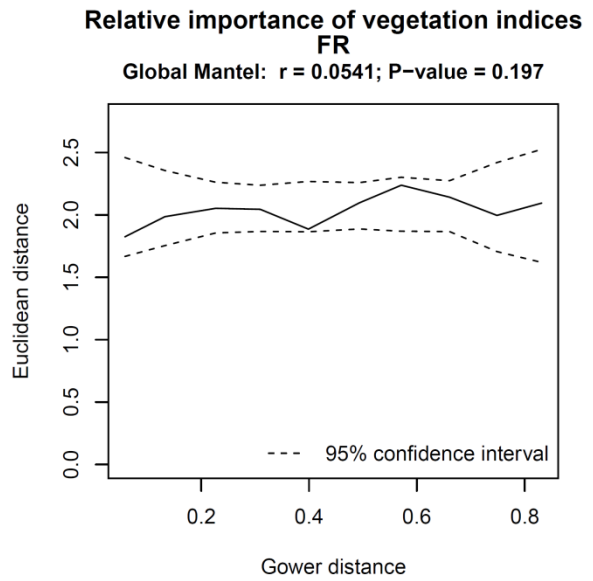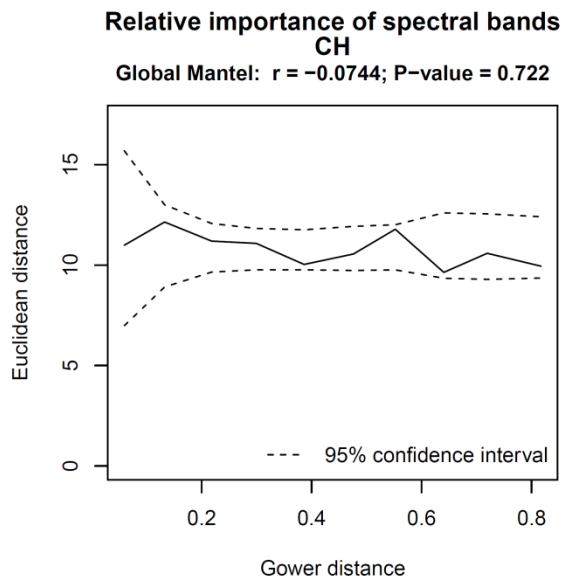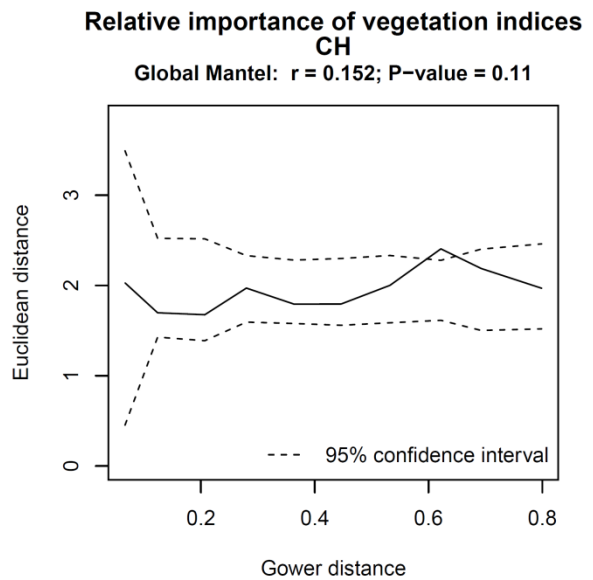

ESM2 Fig 11: **Functional dependency of relative importance of RS-predictors** between the species for both the French site (FR) and the Swiss site (CH). The x-axis represents the functional distance between the species and the y-axis differences in AIS-predictors (either reflectance recorded in the spectral bands or vegetation indices). Only species with distribution models showing fair to good prediction accuracy ( $AUC > 0.7$ ) were considered. Confidence intervals were computed with random re-allocation of predictor importance between the species (9999 permutations)



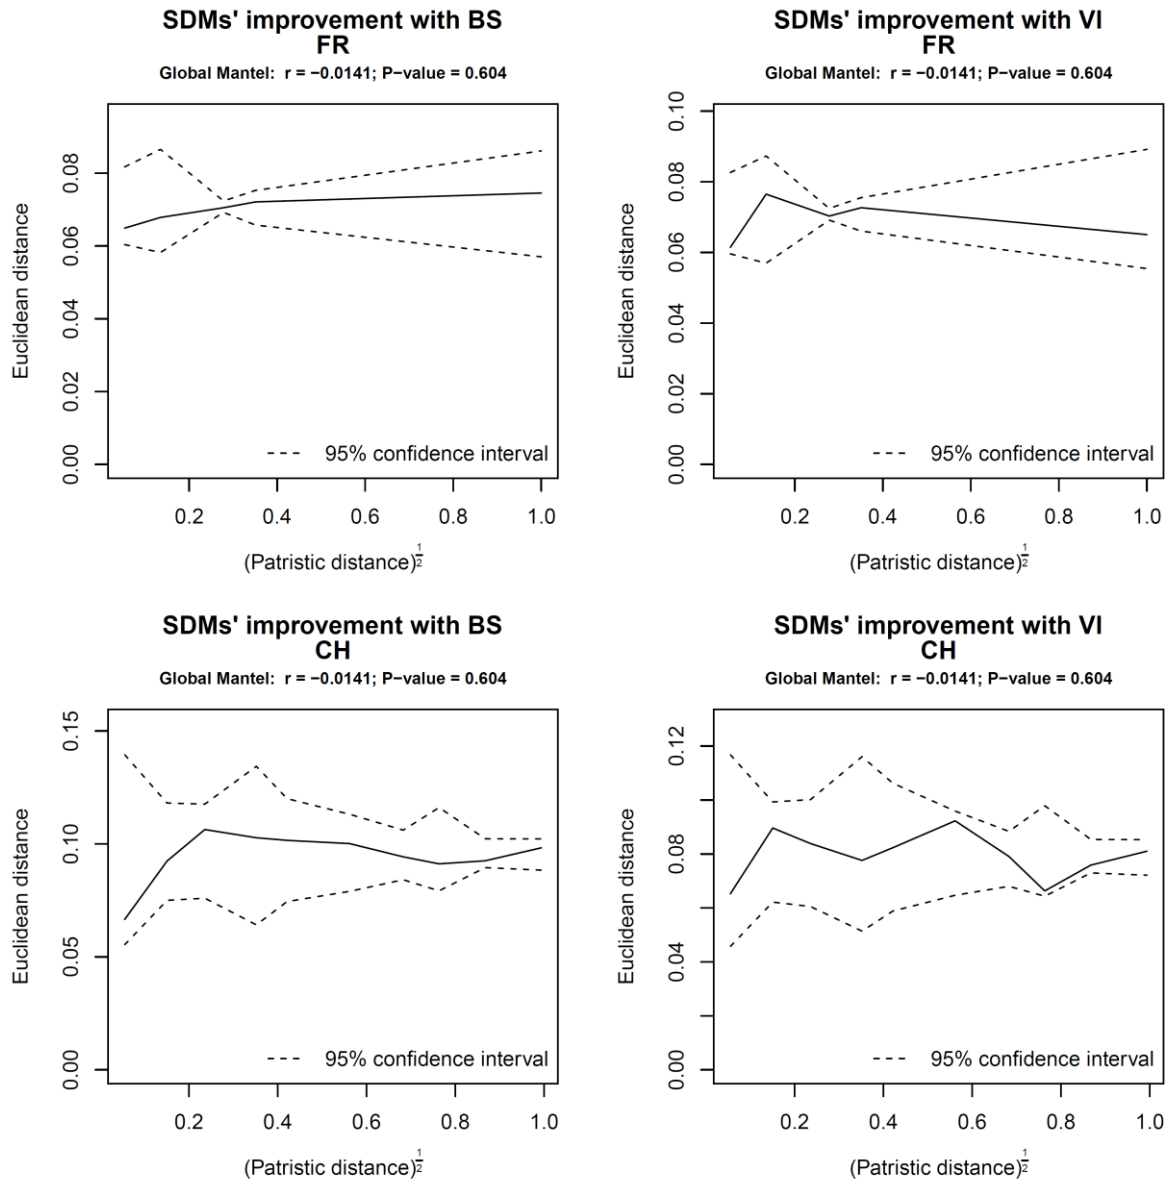

ESM2 Fig 12: **Phylogenetic dependency of model improvement among species with addition of AIS-predictors** for the French site (FR) and the Swiss site (CH). The x-axis represents the phylogenetic distance between the species and the y-axis differences in model improvement when adding AIS-predictors (either reflectance recorded in the spectral bands (BS) or vegetation indices (VI)) to topographic predictors. Confidence intervals were computed with random re-allocation of AUC values between the species (9999 permutations)

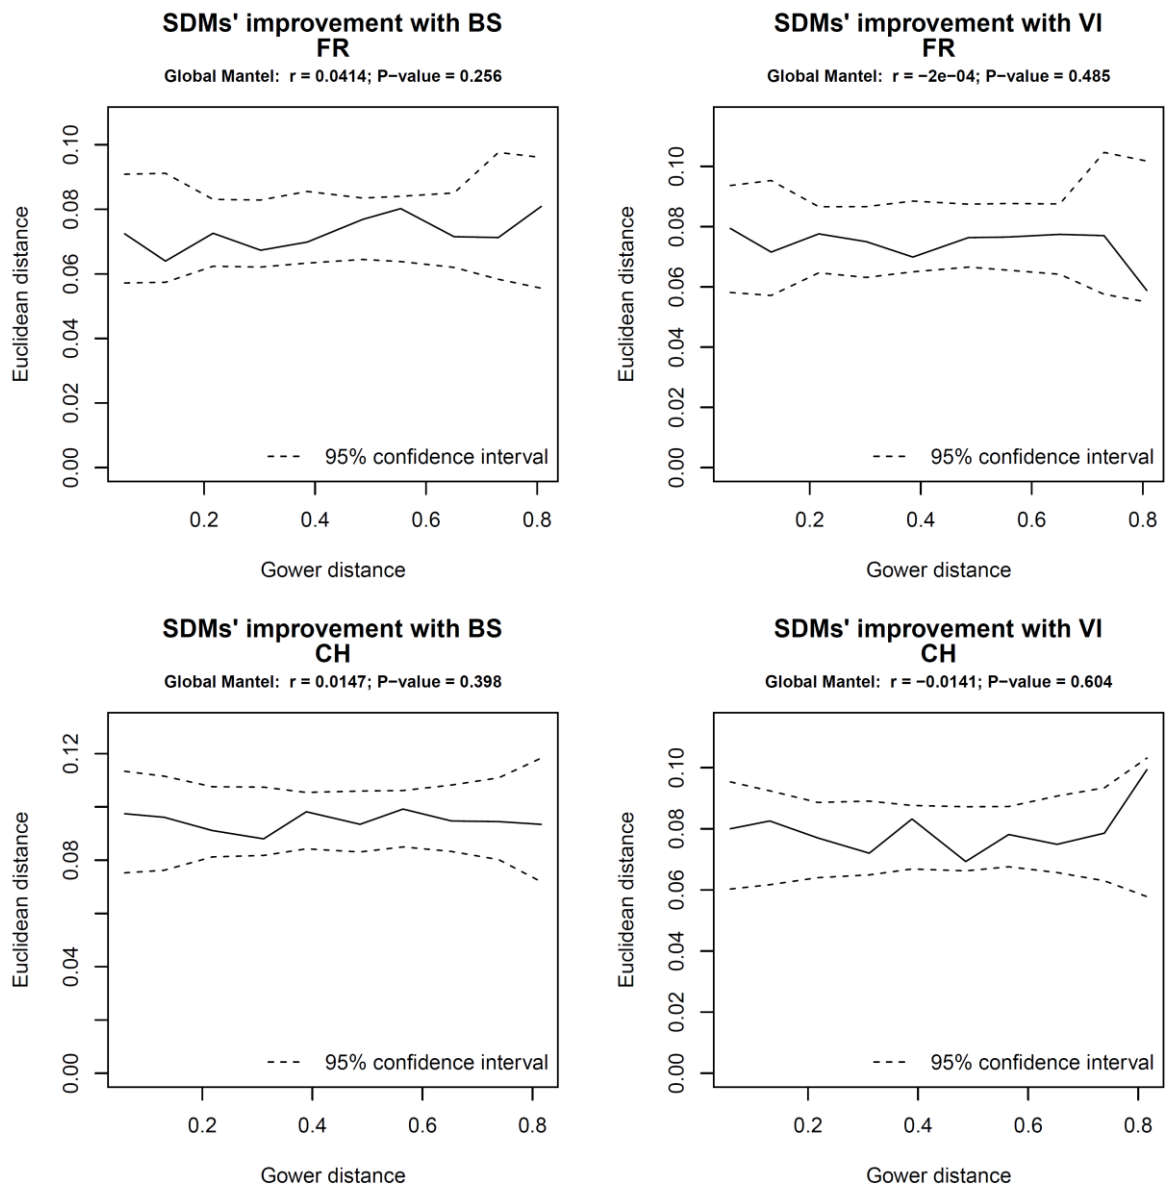

ESM2 Fig 13: **Functional dependency of model improvement among species with addition of AIS-predictors** for the French site (FR) and the Swiss site (CH). The x-axis represents the functional distance between the species and the y-axis differences in model improvement when adding AIS-predictors (either reflectance recorded in the spectral bands (BS) or vegetation indices (VI)) to topographic predictors. Confidence intervals were computed with random re-allocation of AUC values between the species (9999 permutations)

## References

1. Hardy, O. J. & Pavoine, S. 2012 Assessing phylogenetic signal with measurement error: a comparison of Mantel tests, Blomberg et al.'s  $K$ , and phylogenetic distograms. *Evolution* **66**, 2614–21. (doi:10.1111/j.1558-5646.2012.01623.x)
2. Thuiller, W. et al. 2014 Are different facets of plant diversity well protected against climate and land cover changes? A test study in the French Alps. *Ecography (Cop.)*. , Early view. (doi:10.1111/ecog.00670)
3. Roquet, C., Thuiller, W. & Lavergne, S. 2013 Building megaphylogenies for macroecology: taking up the challenge. *Ecography (Cop.)*. **36**, 13–26. (doi:10.1111/j.1600-0587.2012.07773.x)
4. Ndiribe, C., Pellissier, L., Antonelli, S., Dubuis, A., Pottier, J., Vittoz, P., Guisan, A. & Salamin, N. 2013 Phylogenetic plant community structure along elevation is lineage specific. *Ecol. Evol.* **3**, 4925–39. (doi:10.1002/ece3.868)
5. Ollinger, S. V 2011 Sources of variability in canopy reflectance and the convergent properties of plants. *New Phytol.* **189**, 375–94. (doi:10.1111/j.1469-8137.2010.03536.x)
6. Homolová, L., Malenovský, Z., Clevers, J. G. P. W., García-Santos, G. & Schaepman, M. E. 2013 Review of optical-based remote sensing for plant trait mapping. *Ecol. Complex.* **15**, 1–16. (doi:10.1016/j.ecocom.2013.06.003)
7. Kleyer, M. et al. 2008 The LEDA Traitbase: a database of life-history traits of the Northwest European flora. *J. Ecol.* **96**, 1266–1274. (doi:10.1111/j.1365-2745.2008.01430.x)
8. Gower, J. 1971 A general coefficient of similarity and some of its properties. *Biometrics* **27**, 857–871.
